# Supplementary material for: Early stages of catalyst aging in the iridium mediated water oxidation reaction
Source: Royal Society of Chemistry journal article supplement (doi:10.1039/c6cp00751a), 2016-01-01
Supplement: c6cp00751a1.pdf [file c6cp00751a1.pdf]

Supporting Material to:

## Early stages of catalyst aging in the iridium mediated water oxidation reaction

*D. G. H. Hetterscheid, C. J. M. Van der Ham, O. Diaz-Morales, M. W. G. M. Verhoeven, A. Longo, D. Banerjee, J. W. Niemantsverdriet, J. N. H. Reek and M. C. Feiters*

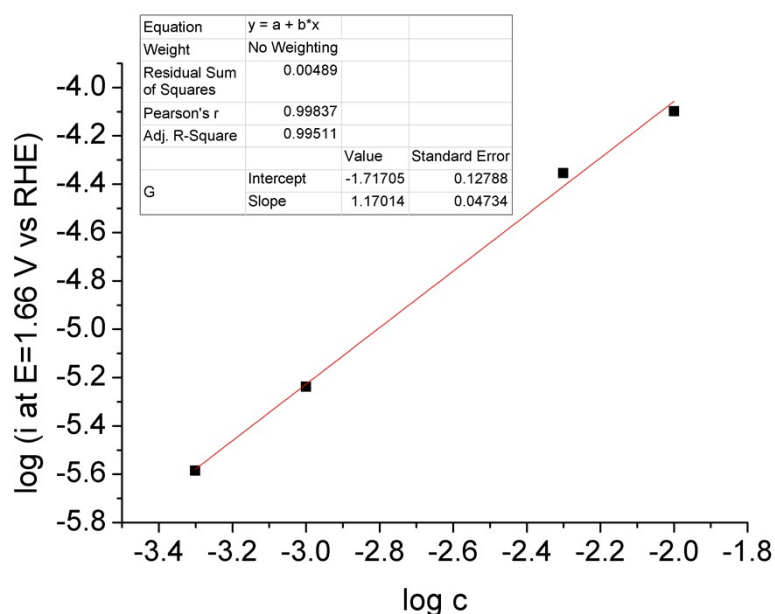

**Figure S1.** Kinetic plot in which the concentration of **1** dropcasted is depicted versus the logarithm of the observed current. A first order rate dependence in iridium was found.

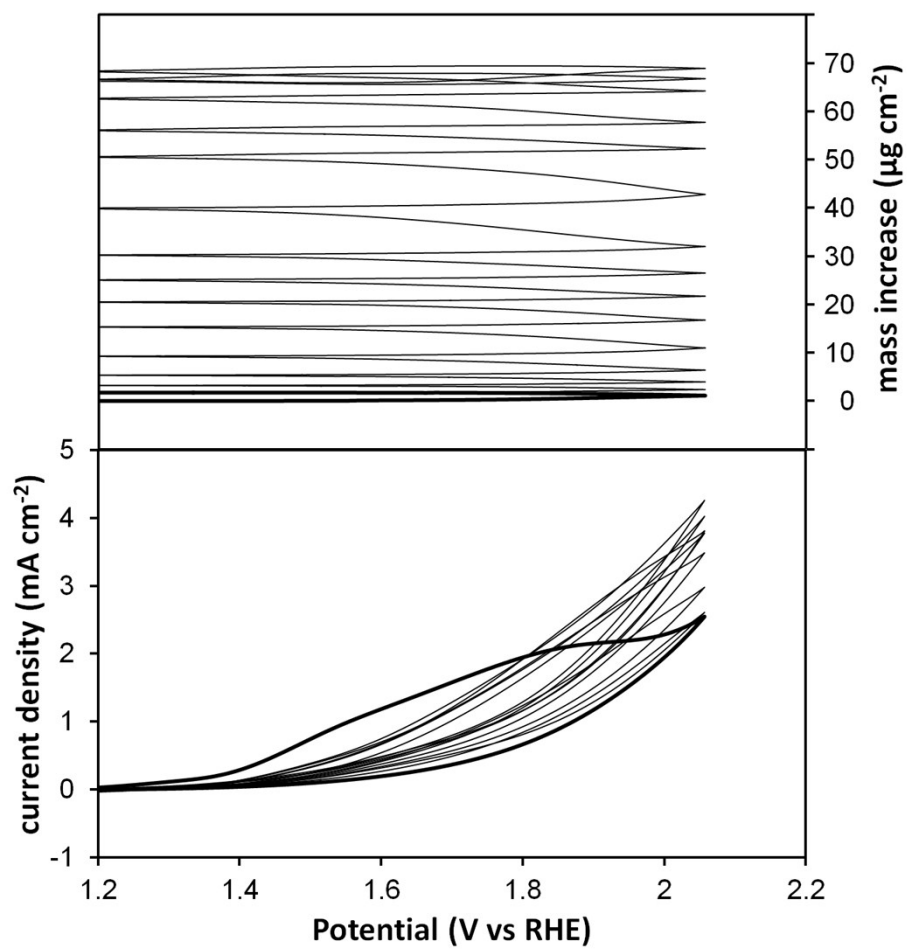

**Figure S2.** EQCM experiment wherein the mass balance (top) and current density (bottom) are simultaneously followed as a function of applied potential in case of a 1 mM solution of **1** in 100 mM  $\text{Na}_2\text{SO}_4$  (non-buffered) on a relatively rough gold EQCM electrode. The first scan is depicted in bold.

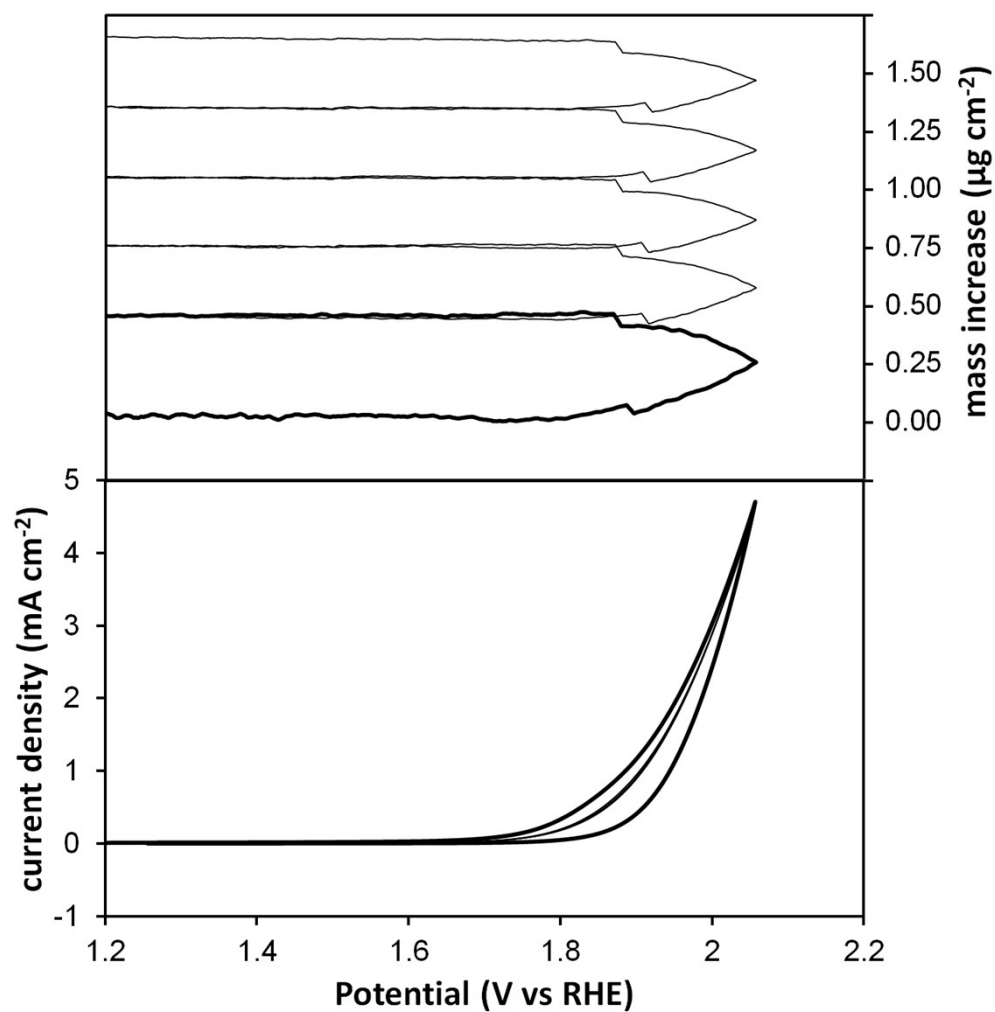

**Figure S3.** EQCM experiment wherein the mass balance (top) and current density (bottom) are simultaneously followed as a function of applied potential in case of a 1 mM solution of **1** in 100 mM  $\text{Na}_2\text{HPO}_4$  on a gold electrode. The first scan is depicted in bold. Phosphate is an inhibitor of catalytic activity mediated by **1**.

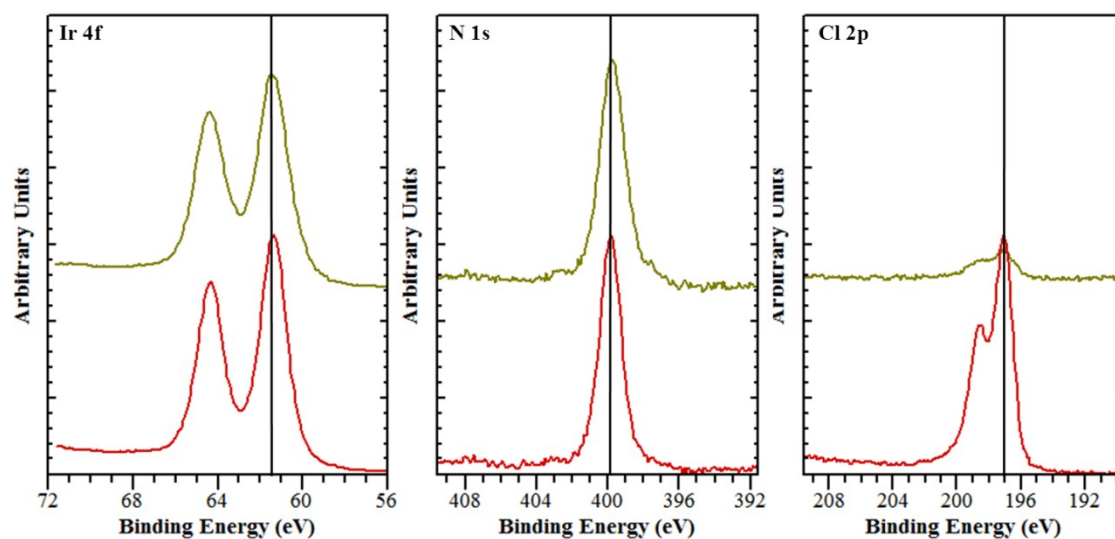

**Figure S4.** Iridium 4f, nitrogen 1s and chloride 2p XPS signals of **3** (red) and **1** (olive) powders. The lines indicate a binding energy of 61.4 eV for iridium, 399.8 for nitrogen and 197.1 for chloride. A trace of chloride was also observed in the sample of **1**, even though chloride analysis of the same batch by elemental analysis did not show any chloride content.

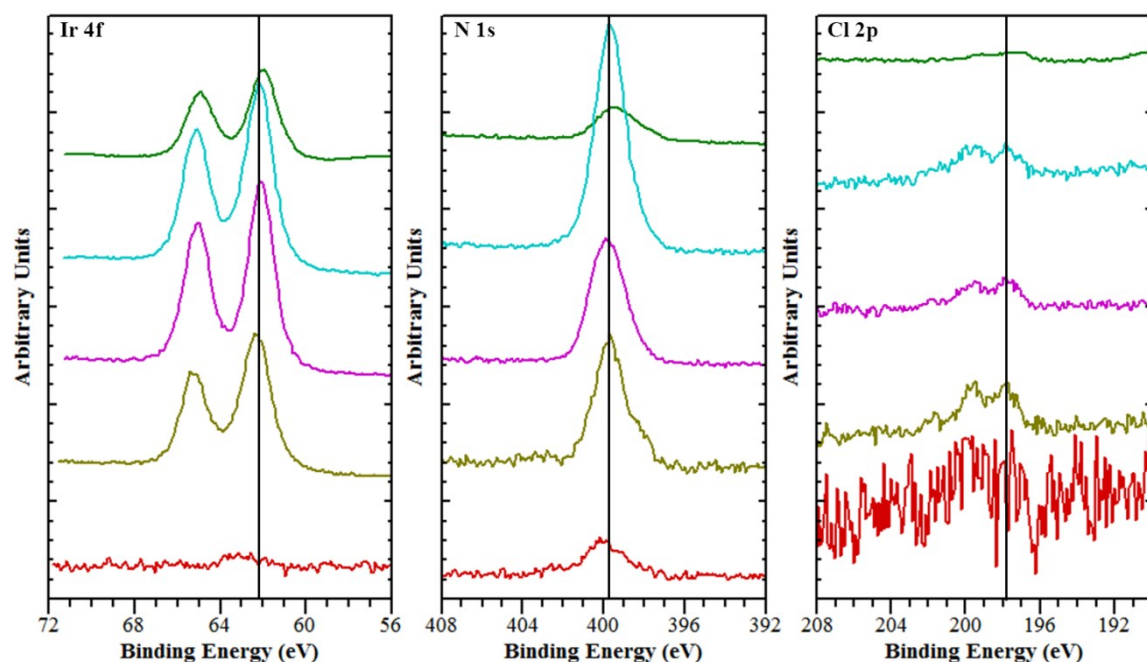

**Figure S5.** Iridium 4f signal, nitrogen 1s signal and chloride 2p signal of glassy carbon (red), **3** deposited on glassy carbon (olive), **1** deposited on glassy carbon (purple), **1** deposited on glassy carbon after partial desorption in a blank  $\text{Na}_2\text{SO}_4$  solution (blue) and **1** deposited on gold (green). Except for glassy carbon, in all cases a iridium binding energy of 62.2 eV was found, which is significantly different to both powders of **1** and **3** (61.4 eV) as well as iridium oxide ( $\text{Ir}_2\text{O}_3$ : 61.8 eV and  $\text{IrO}_2$ : 63.0 eV). The nitrogen 1s binding energy of the adsorbed samples is identical to that of the powders of **1** and **3**, indicating that the NHC ligand is still intact. Chloride is not retained in the absorbed sample when starting from **3**.

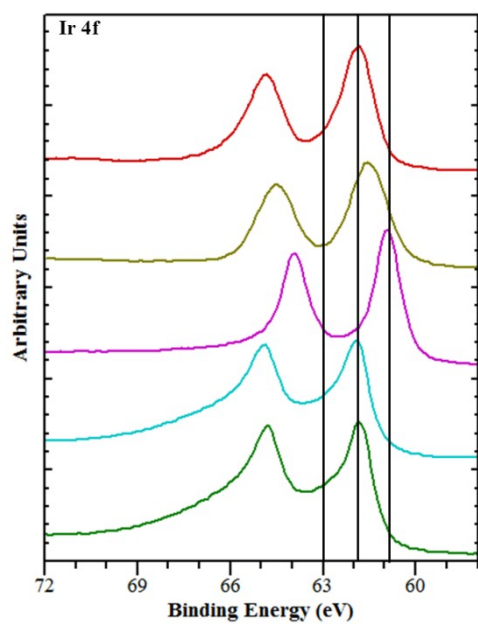

**Figure S6.** Iridium 4f XPS signals of IrCl<sub>4</sub> • x H<sub>2</sub>O (red), Iridium(III) 2,4-Pentadionate (olive), iridium foil sputtered (purple), iridium foil calcined (blue) and calcined IrCl<sub>3</sub> • x H<sub>2</sub>O (green) yielding binding energies of 60.7 eV for metallic iridium and 61.8 eV for Ir<sub>2</sub>O<sub>3</sub>. IrO<sub>2</sub> has a binding energy of 63.0 eV.

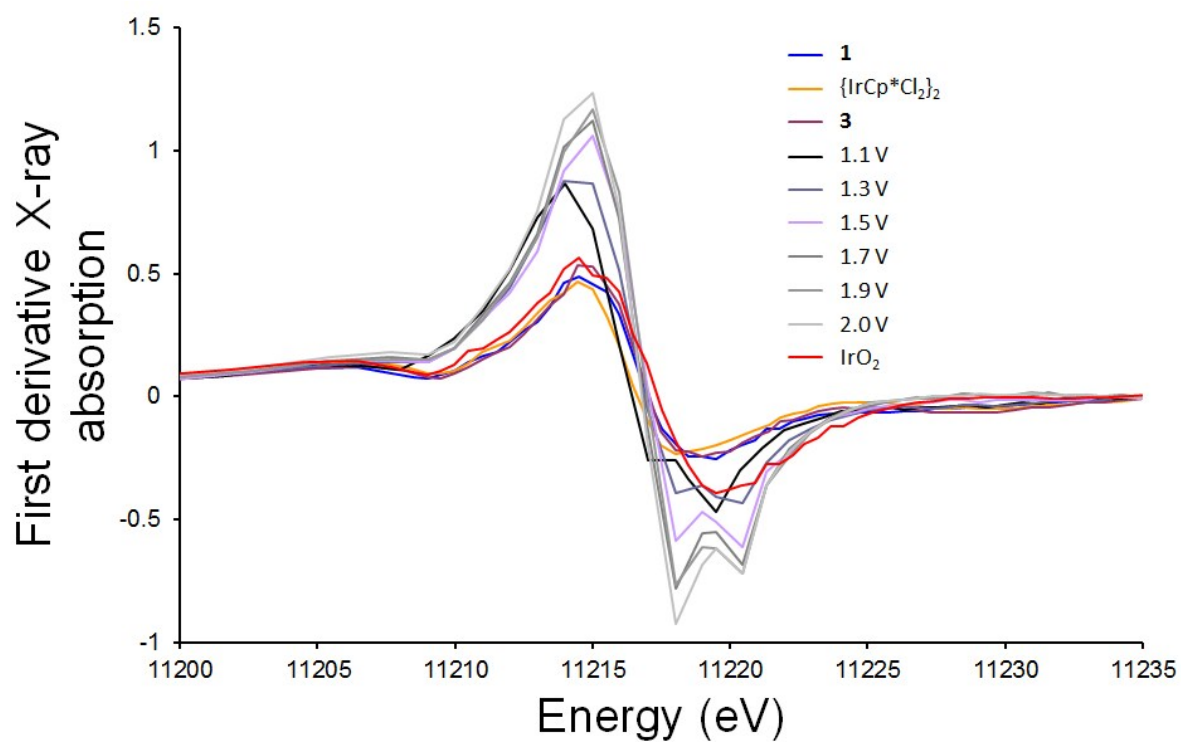

**Figure S7.** First derivative of the X-ray absorption at the iridium L<sub>3</sub> edge for selected reference complexes **1**, **3**,  $\{\text{IrCp}^*\text{Cl}_2\}_2$  and IrO<sub>2</sub> as well as **DM**|GC prepared at 1.1 V, 1.3 V, 1.5 V, 1.7 V, 1.9 V and 2.0 V versus RHE.
